# Supplementary material for: A wax chalk and self-heating paper-based analytical device (SH-PAD) for the detection of bisphenol A
Source: Royal Society of Chemistry journal article supplement (doi:10.1039/d4ay01245c), 2024-01-01
Supplement: d4ay01245c2.pdf [file d4ay01245c2.pdf]

## Supplementary Information

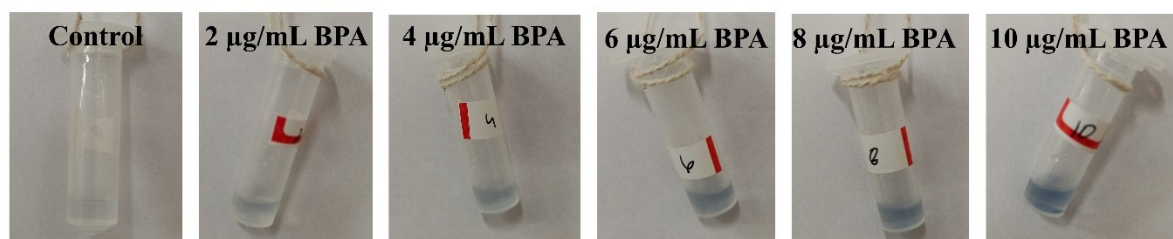

Increase in intensity

|                     | Control       | 2 µg/mL BPA    | 4 µg/mL BPA    | 6 µg/mL BPA    | 8 µg/mL BPA    | 10 µg/mL BPA   |
|---------------------|---------------|----------------|----------------|----------------|----------------|----------------|
| Absorbance @ 760 nm | 0.088 ± 0.020 | 0.158 ± 0.0026 | 0.259 ± 0.0055 | 0.347 ± 0.0316 | 0.383 ± 0.0051 | 0.424 ± 0.0532 |

Supplementary Figure 1. Bulk assay between Folin-Ciocalteu (FC) reagent and BPA with their respective absorbance at 760 nm.

Supplementary Table 1: Comparison of advantages and disadvantages of Wax chalk and Self-Heating PAD.

| Method           | Advantages                                                                                                                                                         | Disadvantages                                                                                                                                                                        |
|------------------|--------------------------------------------------------------------------------------------------------------------------------------------------------------------|--------------------------------------------------------------------------------------------------------------------------------------------------------------------------------------|
| Wax Chalk        | <ul style="list-style-type: none"><li>• Simple fabrication</li><li>• Easily accessible &amp; Cost-effective</li><li>• Can be integrated with pen plotter</li></ul> | <ul style="list-style-type: none"><li>• Reproducibility issues</li><li>• Unable to confine certain surfactants</li><li>• Requirement of an external heat source</li></ul>            |
| Self-Heating PAD | <ul style="list-style-type: none"><li>• All in one multiplexed device</li><li>• Cost-effective</li><li>• Can be integrated with Smart phone</li></ul>              | <ul style="list-style-type: none"><li>• Slightly expensive</li><li>• Lamination sheet is non-biodegradable</li><li>• Fabrication time exceeds that of the wax chalk device</li></ul> |

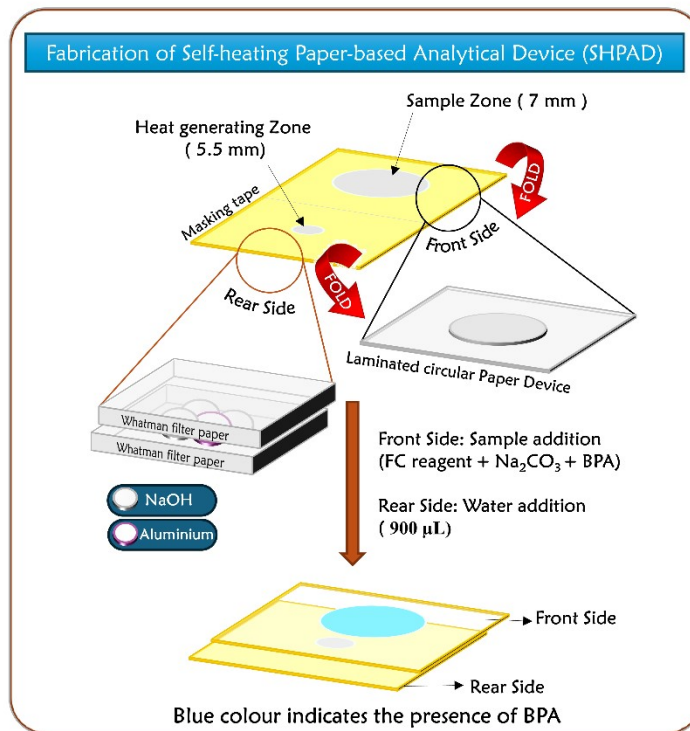

Supplementary Figure 2: Fabrication of Self-Heating Paper-based Analytical Device (SHPAD)
